# Supplementary material
Source: PubMed Central journal article supplement (PMC3091202)
Supplement: supp_M111.230870_jbc.M111.230870-1.pdf [file supp_M111.230870_jbc.M111.230870-1.pdf]

# Figure S1

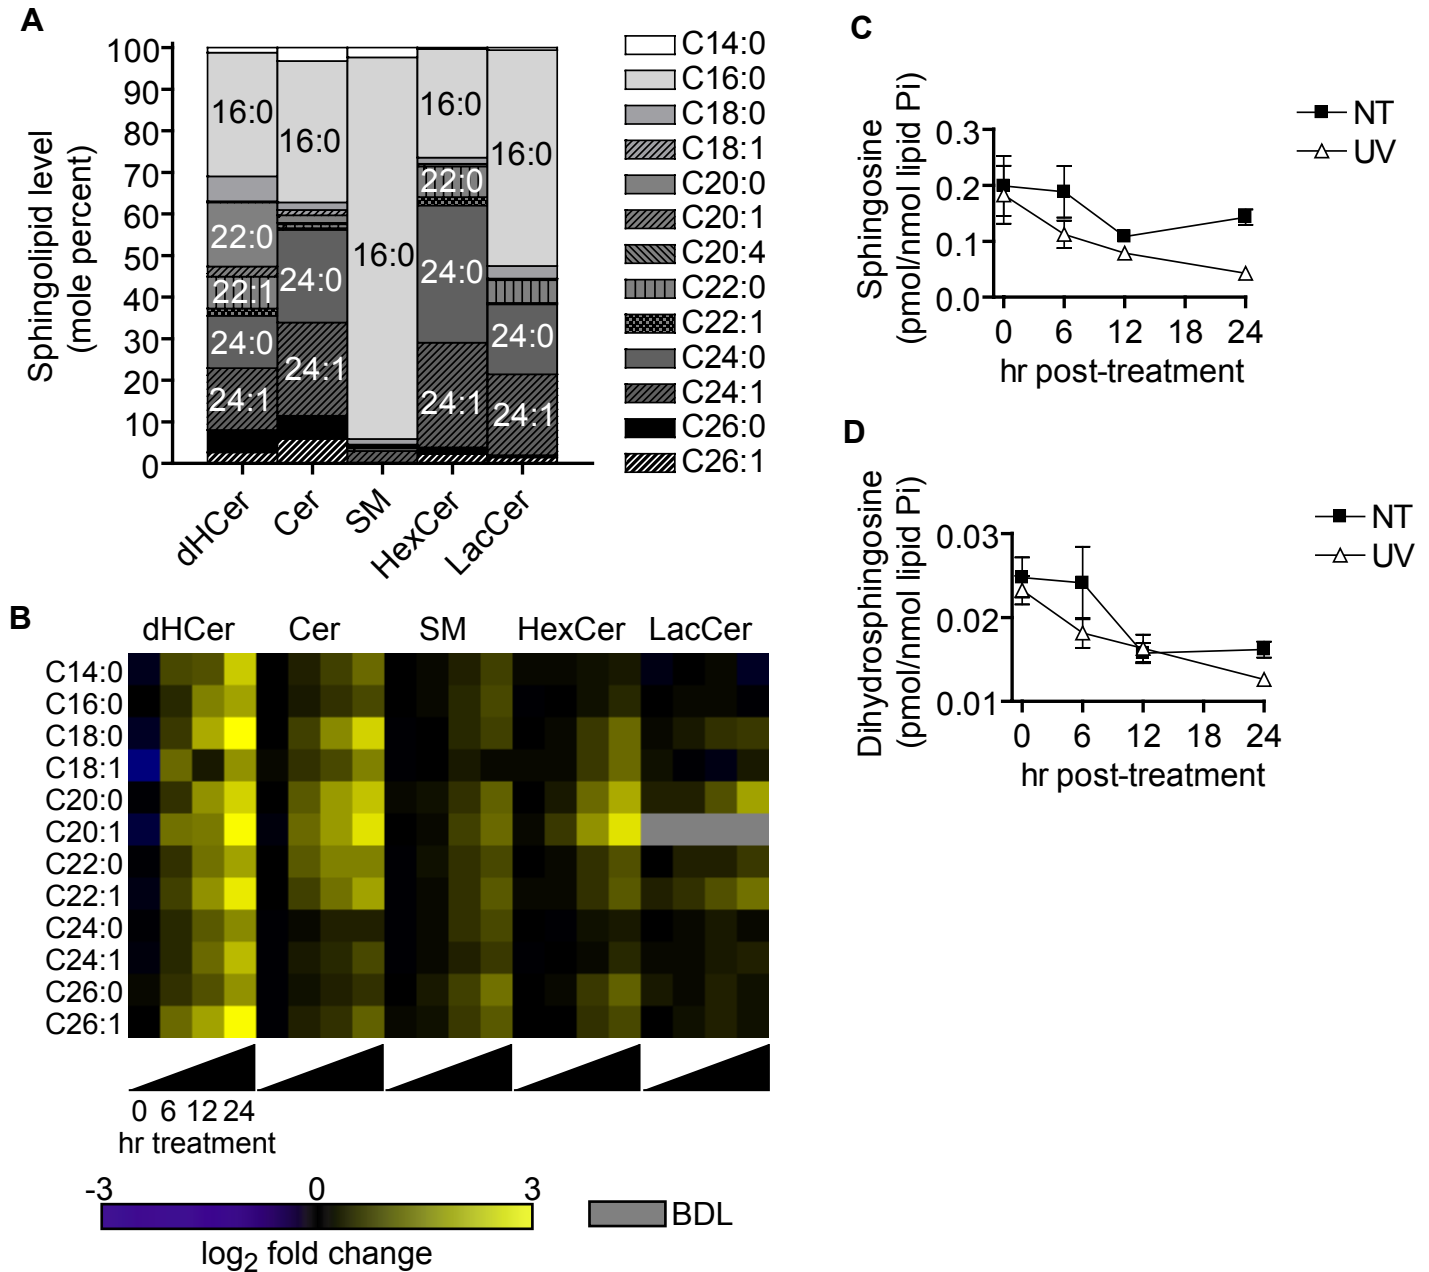

**Figure S1. UV-C induced changes in sphingolipids of different chain lengths and sphingoid bases.** (A) Distribution of acyl-chain lengths in sphingolipids from untreated MCF-7 cells. (B) Changes in individual sphingolipid species following irradiation with 10 mJ/cm<sup>2</sup> UV-C for the indicated timepoints. Sphingolipid levels were determined by HPLC/MS. Data were normalized to total lipid phosphate and expressed as a heatmap of the log<sub>2</sub> fold change over time-matched controls. Data represent mean of three independent experiments. (C-D) Sphingosine (C) and dihydrosphingosine (D) levels were determined as following UV-C irradiation by HPLC/MS and expressed as mean and standard error for three independent experiments.
