# Supplementary material
Source: PubMed Central journal article supplement (PMC3091202)
Supplement: supp_M111.230870_jbc.M111.230870-2.pdf [file supp_M111.230870_jbc.M111.230870-2.pdf]

# Figure S2

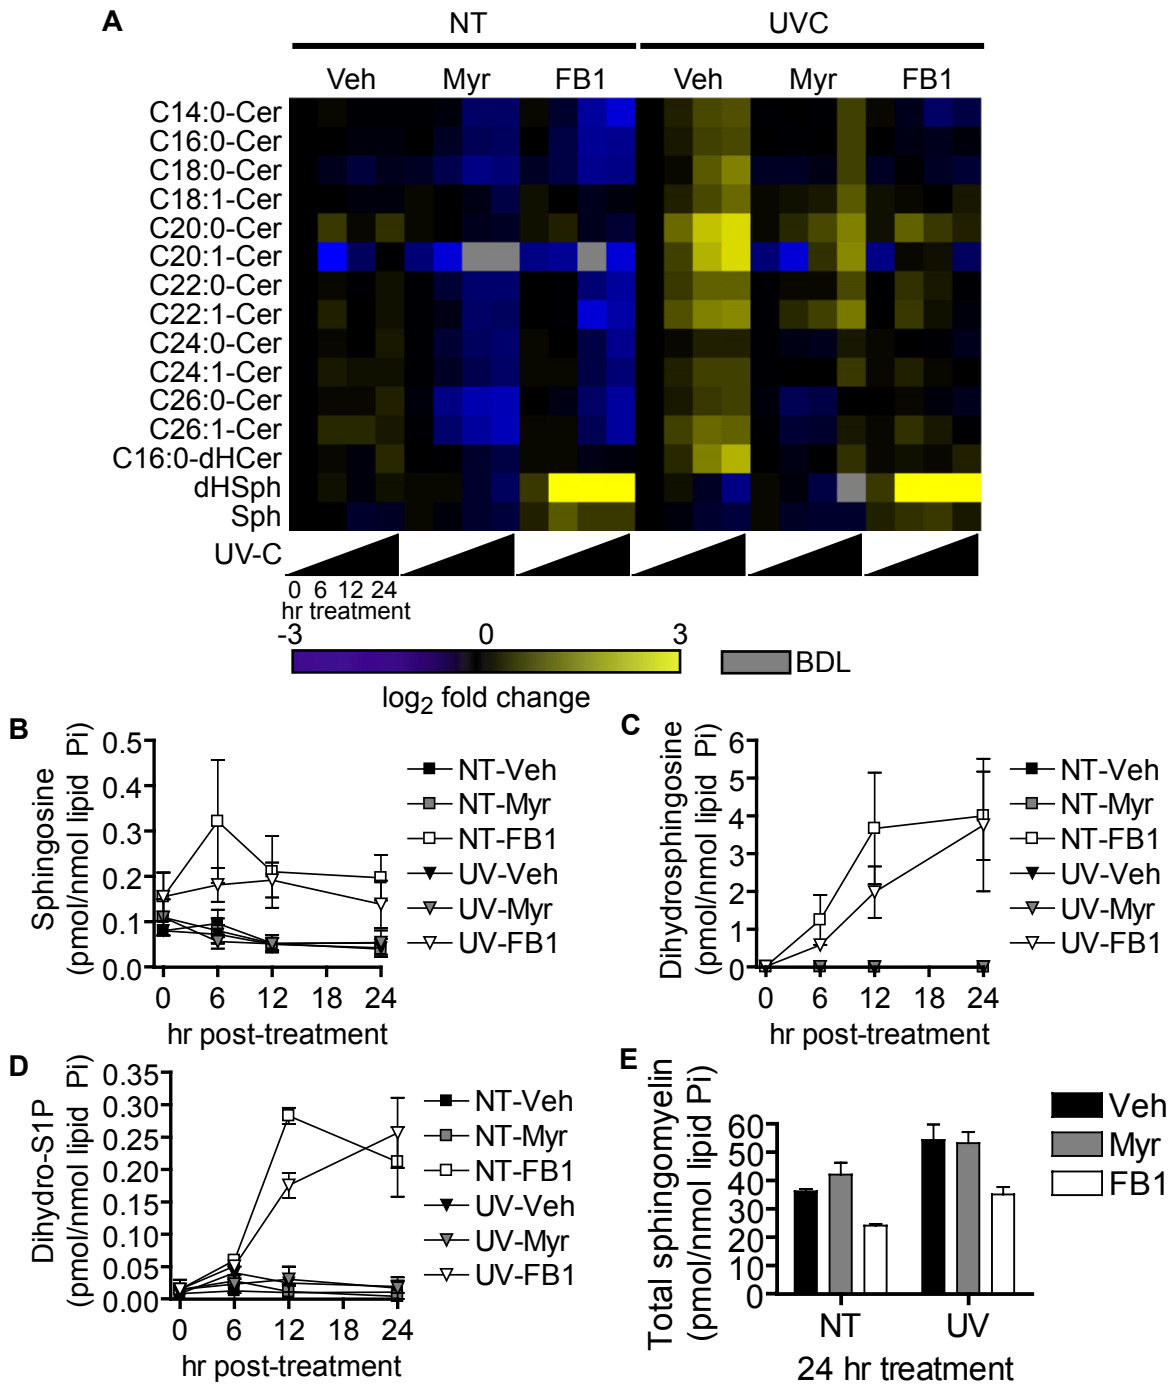

**Figure S2. Effect of Myr and FB1 on UV-C-induced ceramide accumulation.** (A-C) MCF-7 cells preincubated with myriocin (Myr, 100 nM), fumonisins B1 (FB1, 50  $\mu$ M), or vehicle (Veh, methanol, 0.1%) for 30 minutes and then treated with 10 mJ/cm<sup>2</sup> UV-C. The cells were then incubated for the indicated durations and harvested for analysis of ceramide levels by HPLC/MS. (A) Effects of Myr and FB1 on the generation of specific ceramide species following UV-C irradiation. Data were normalized to total lipid phosphate and expressed as a heatmap of the log<sub>2</sub> fold change over untreated cells. Data represent mean of three independent experiments. (B-D) Effect of Myr and FB1 on sphingosine (B) and dihydrospingosine (C) and dihydrospingosine-1-phosphate (dHS1P) (D) levels following UV-C irradiation. (E) Effect of Myr and FB1 on SM levels 24 hr following UV-C irradiation. Data represent mean and standard error of three independent experiments, and sphingolipid levels are normalized to total lipid phosphate.
