# Supplementary material
Source: PubMed Central journal article supplement (PMC3091202)
Supplement: supp_M111.230870_jbc.M111.230870-4.pdf [file supp_M111.230870_jbc.M111.230870-4.pdf]

## Figure S4

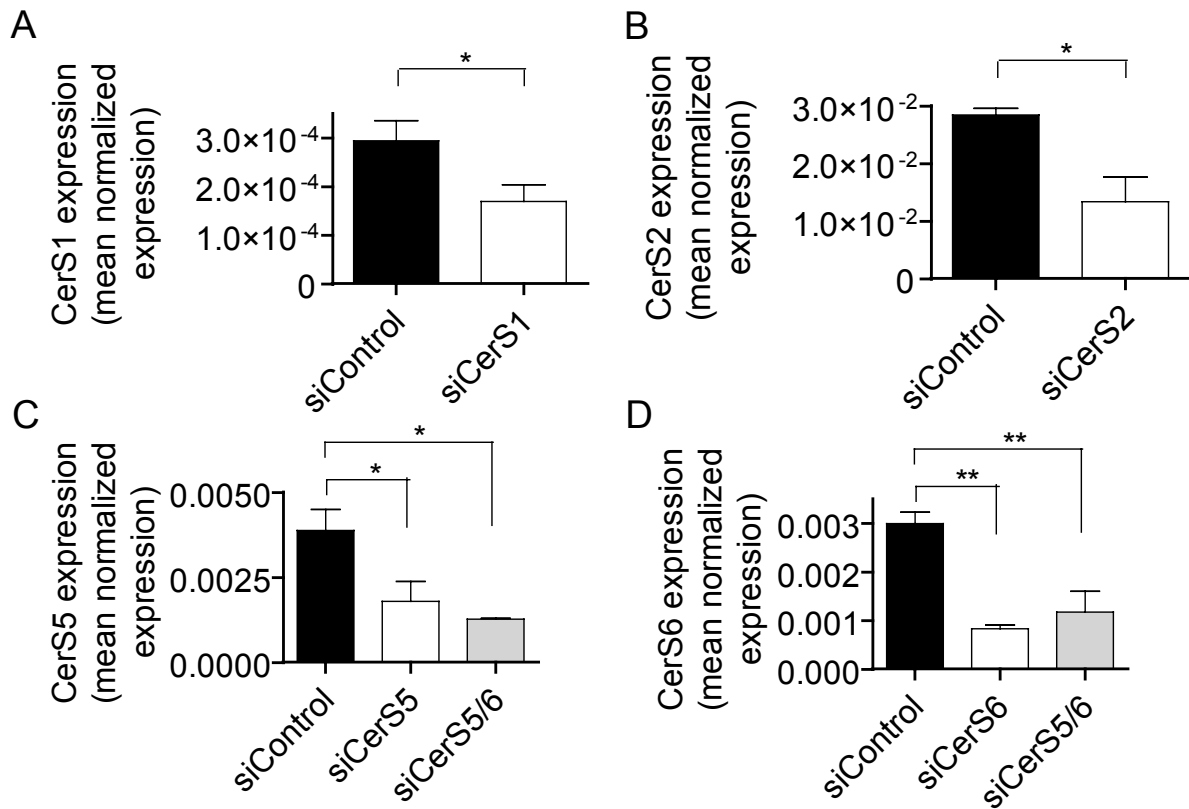

**Figure S4. Knockdown of CerS using small interfering RNA.** (A-C) MCF-7 cells were transfected with 20 nM siRNA targeted against CerS1, CerS2, CerS5, CerS6, combined CerS5/CerS6 (siCerS5/6, 10 nM each) or non-targeted control (siControl) for 48 hr. RNA was then harvested and analyzed by real-time Q-PCR for expression of CerS1 (A), CerS2 (B), CerS5 (C), and CerS6 (D). Statistical significance was determined by Student's *t* test (A-B) or one-way ANOVA with Bonferroni post-hoc tests (C-D). CerS mRNA levels were normalized to the levels of  $\beta$ -actin. Data are mean and standard error for three independent experiments. \* $p < 0.05$ , \*\* $p < 0.01$ , \*\*\* $p < 0.001$ .
