# Supplementary material
Source: PubMed Central journal article supplement (PMC3091202)
Supplement: supp_M111.230870_jbc.M111.230870-6.pdf [file supp_M111.230870_jbc.M111.230870-6.pdf]

**Table S2**

| Ceramide species | Not treated   |               | UV-treated    |               |
|------------------|---------------|---------------|---------------|---------------|
|                  | siControl     | siCerS5/6     | siControl     | siCerS5/6     |
| <b>C14:0-Cer</b> | 0.027 ± 0.001 | 0.012 ± 0.001 | 0.187 ± 0.009 | 0.113 ± 0.011 |
| <b>C16:0-Cer</b> | 0.221 ± 0.005 | 0.071 ± 0.012 | 1.008 ± 0.084 | 0.475 ± 0.081 |
| <b>C18:0-Cer</b> | 0.012 ± 0.001 | 0.012 ± 0.000 | 0.181 ± 0.012 | 0.219 ± 0.013 |
| <b>C18:1-Cer</b> | 0.006 ± 0.000 | 0.005 ± 0.001 | 0.045 ± 0.003 | 0.047 ± 0.003 |
| <b>C20:0-Cer</b> | 0.010 ± 0.001 | 0.010 ± 0.001 | 0.195 ± 0.028 | 0.222 ± 0.014 |
| <b>C20:1-Cer</b> | 0.001 ± 0.000 | 0.001 ± 0.000 | 0.018 ± 0.001 | 0.024 ± 0.001 |
| <b>C22:0-Cer</b> | 0.020 ± 0.001 | 0.026 ± 0.002 | 0.096 ± 0.007 | 0.109 ± 0.004 |
| <b>C22:1-Cer</b> | 0.012 ± 0.001 | 0.014 ± 0.001 | 0.063 ± 0.003 | 0.078 ± 0.004 |
| <b>C24:0-Cer</b> | 0.191 ± 0.009 | 0.257 ± 0.023 | 0.523 ± 0.064 | 0.520 ± 0.025 |
| <b>C24:1-Cer</b> | 0.261 ± 0.015 | 0.336 ± 0.028 | 0.816 ± 0.044 | 0.924 ± 0.043 |
| <b>C26:0-Cer</b> | 0.030 ± 0.003 | 0.037 ± 0.006 | 0.124 ± 0.016 | 0.112 ± 0.009 |
| <b>C26:1-Cer</b> | 0.055 ± 0.007 | 0.070 ± 0.011 | 0.237 ± 0.015 | 0.253 ± 0.011 |

**Table S2. Effects of combined CerS5 and CerS6 knockdown on UV-induced accumulation of ceramide subspecies.** (A) MCF-7 cells were transfected with 20 nM siRNA targeted against CerS5 and CerS6 (siCerS5/6, 10 nM each, total 20 nM), or non-targeted control (siControl, 20 nM) for 48 hr. The media were then changed, and cells were treated with (UV) or without (NT) 10 mJ/cm<sup>2</sup> UV-C followed by incubation for 24 hours. Ceramide levels were determined by HPLC/MS. Data are pmol ceramide/nmol lipid phosphate and represent the mean and standard error of four independent experiments.
